# Supplementary material for: Exploration speed in captivity predicts foraging tactics and diet in free‐living red knots
Source: PubMed Central journal article supplement — J Anim Ecol. 2021 Nov 22;91(2):356–66. doi: 10.1111/1365-2656.13632 (PMC9299047; doi:10.1111/1365-2656.13632), 2021-11-22
Supplement: JANE-91-356-s002.pdf [file JANE-91-356-s002.pdf]

## Supporting Information

**Research Article:** Exploration speed in captivity predicts foraging tactics and diet in free-living red knots

**Authors:** Selin Ersoy, Christine E. Beardsworth, Anne Dekinga, Marcel T. J. van der Meer, Theunis Piersma, Ton G. G. Groothuis, Allert I. Bijleveld

### Contents:

- Supplementary Figure S1: Mobile arena to score exploration speed at the field site
- Supplementary Figure S2: Indoor arena to score exploratory behaviour in captivity
- Supplementary Figure S3: Histogram of individuals with measured exploration scores
- Supplementary Figure S4: All observed behaviours in the field
- Supplementary Figure S5: Correlation between mobile and indoor arena
- Supplementary Figure S6: Correlation between speed and behaviour
- Supplementary Figure S7: MixSIAR Posterior distribution for plasma
- Supplementary Figure S8: MixSIAR Diet analysis for red blood cell
- Supplementary Figure S9: MixSIAR Posterior distribution for red blood cell
- Supplementary Table S1: Ethogram of all videos recorded behaviours in the field.
- Supplementary Video S1: An example video from personality experiment shows the behaviour of individuals with different exploration speeds (slower, medium, and faster). Note that the original video was speeded up to 8x.
- Supplementary Video S2: An example video from the mobile arena personality experiment shows the automated tracking. Blue dots on top of the bird retrieved from x- and y- coordinates through video tracking software.
- Supplementary Video S3: An example video from field observation shows the use of different foraging tactics (tactile and visual).

### Supplementary Figure S1: Mobile arena to score exploration speed at the field site

The floor of the unit consists of sea water of 20 cm height and 4 identical sand patches 61cm x 40cm x 25cm for birds to explore.

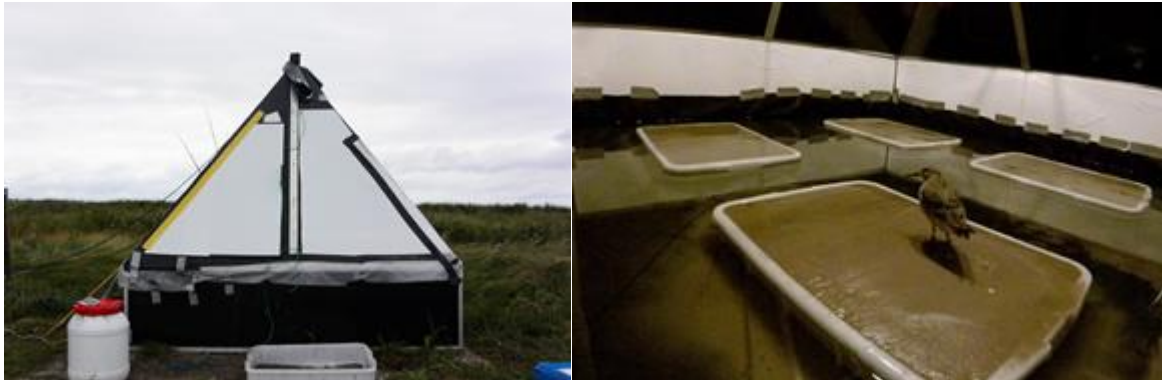

### **Supplementary Figure S2: Indoor arena to score exploratory behaviour in captivity**

The floor of the unit consists of salt water of 30 cm height and 5 identical sand patches 1m x 1m x 35cm for birds to explore in a room measuring 7m x 7m x 3m.

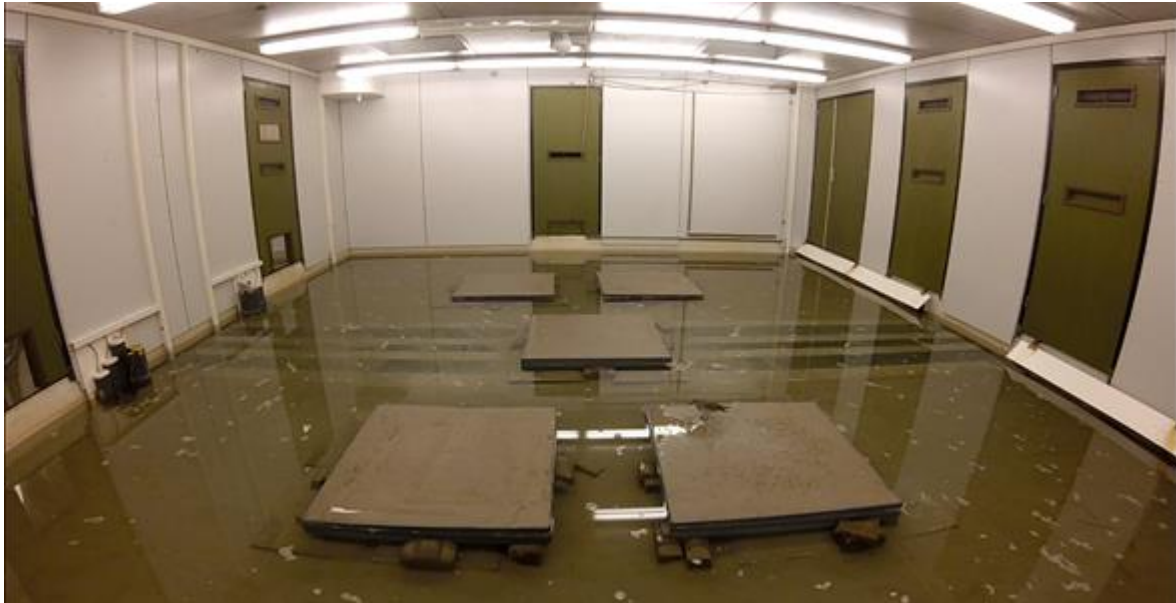

### Supplementary Figure S3: Histogram of individuals with measured exploration scores

The distribution of the exploratory scores of individual red knots which were followed in the field (in yellow) and all red knots with exploratory score (in grey).

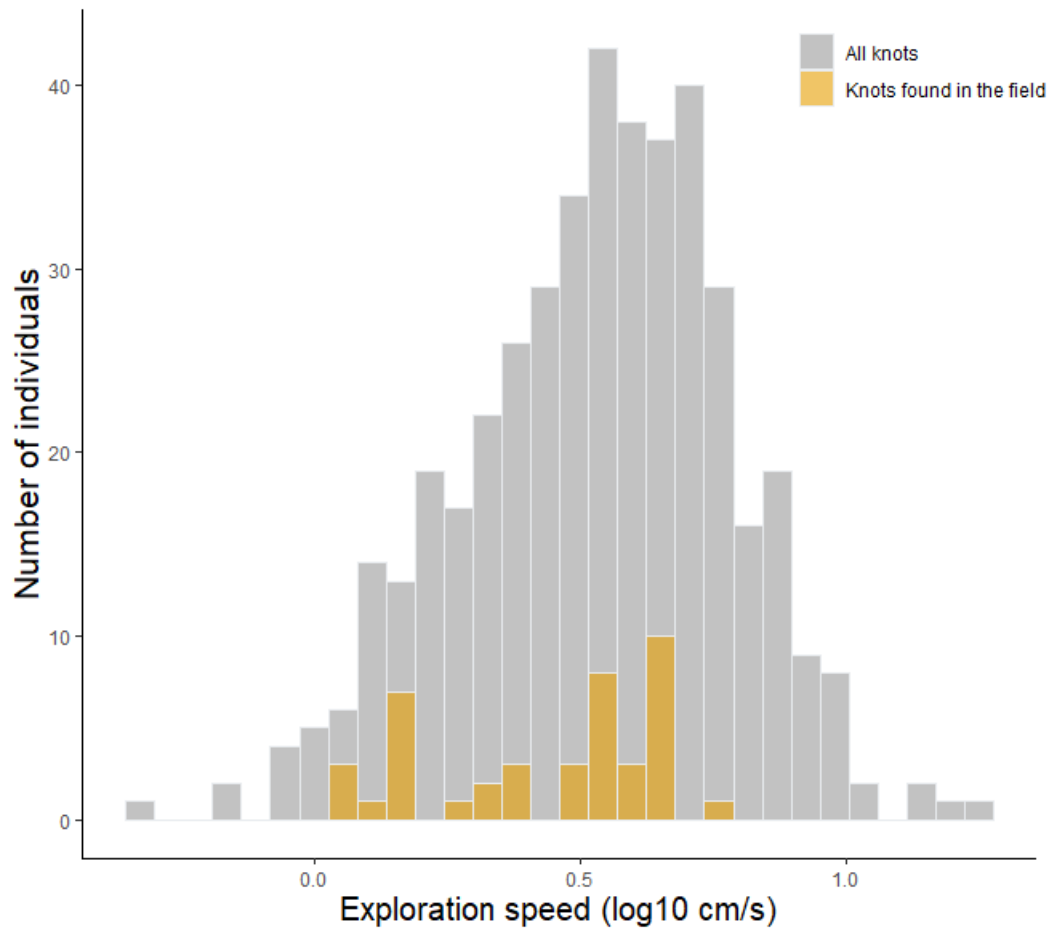

### Supplementary Figure S4: All observed behaviours in the field

Observed behaviours from low tide field observations: foraging 74%, cleaning 11%, moving 0.9%, resting 0.2%, vigilance 0.1%, handling 0.1%.

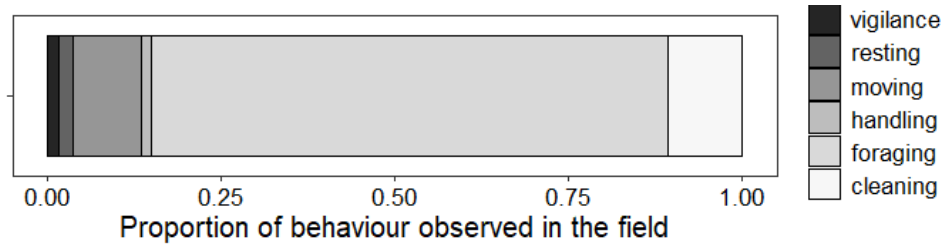

### Supplementary Figure S5: Correlation between mobile and indoor arena

Correlation between the results from the same individuals measured in newly developed mobile method (x axis) on exploration speed (mean speed log<sub>10</sub> cm/s) and the established indoor method (y axis) on exploration behaviour (proportion of time spent searching and walking) in red knots. Probabilities and 95 % confidence intervals are predicted by a GLM with gaussian error distribution.

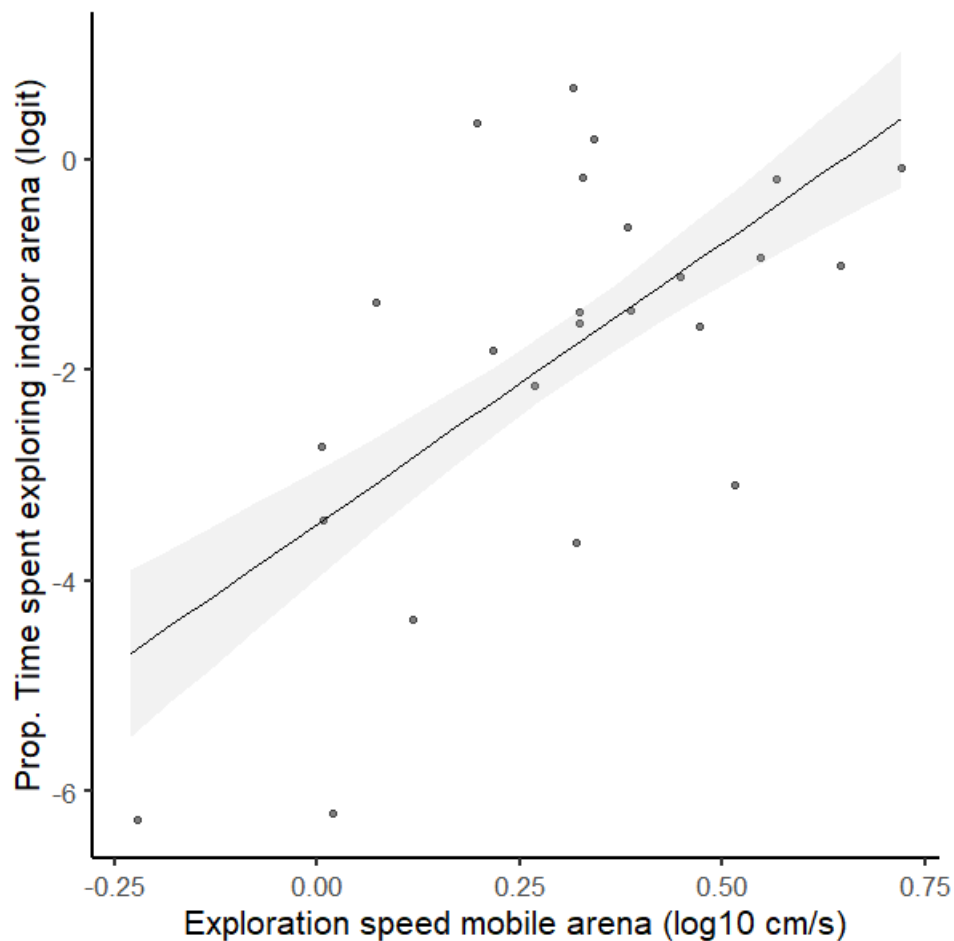

### Supplementary Figure S6: Correlation between speed and behaviour

Correlation between different techniques to score exploration personality on movement scores (mean speed log10 cm/s on the x axis) and behavioural scores (proportion of time spent probing and walking on the y axis). Probabilities and 95 % confidence intervals are predicted by a GLM with gaussian error distribution.  $y = -3.64 + 6.19 x$ ,  $R = 0.62$ .

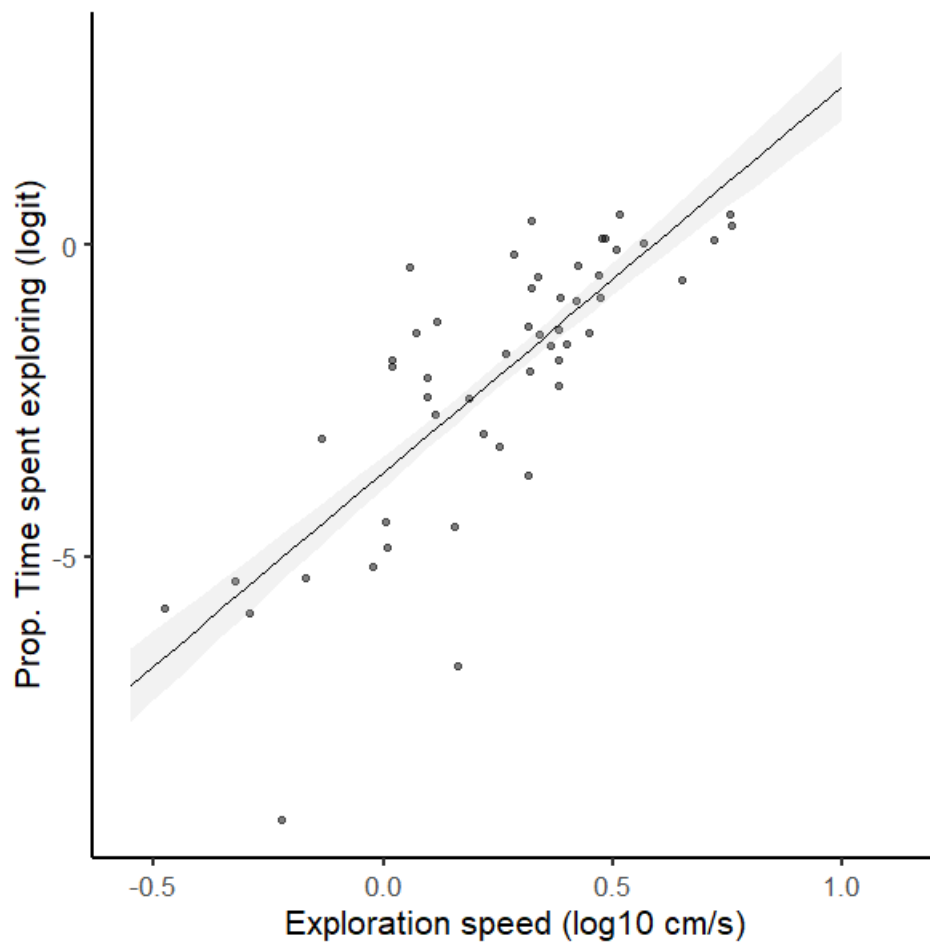

### Supplementary Figure S7: MixSIAR Posterior distribution for plasma

Posterior distribution of model estimates for slower exploring knots (on the left) and faster exploring knots (on the right). Diet estimated from plasma stable isotope samples. For slower exploring red knots, the model estimate of  $p_{\text{hard-shelled prey}}$  is 0.76 (Median, 2.5 % CrI = 0.61, 97.5 % CrI = 0.88) and  $p_{\text{soft prey}}$  is 0.24 (Median, 2.5 % CrI = 0.12, 97.5 % CrI = 0.39). For faster exploring red knots, model estimate of  $p_{\text{hard-shelled prey}}$  is 0.4 (Median, 2.5 % CrI = 0.22, 97.5 % CrI = 0.58) and  $p_{\text{soft prey}}$  is 0.6 (Median, 2.5 % CrI = 0.42, 97.5 % CrI = 0.7).

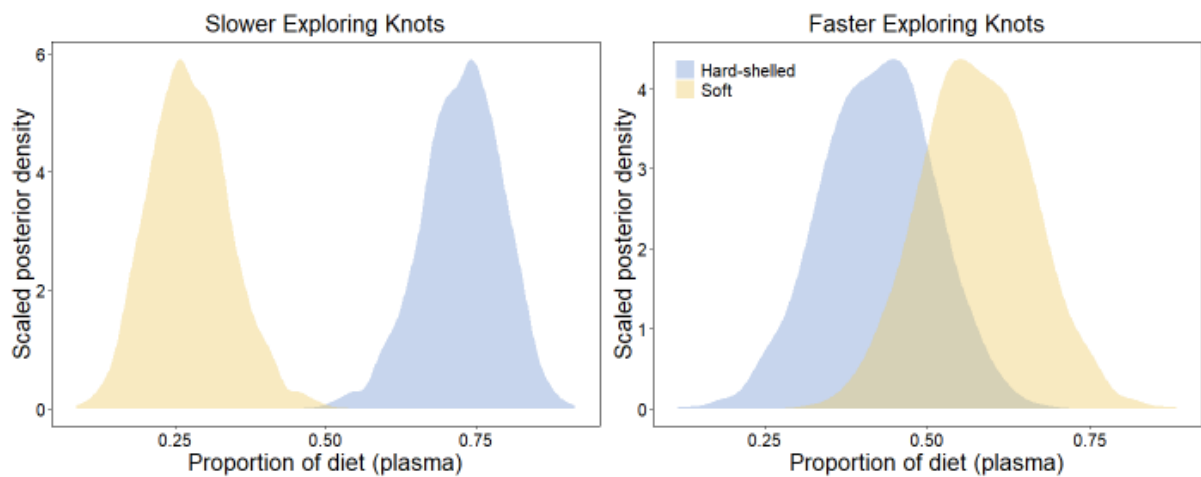



### Supplementary Figure S7: MixSIAR Diet analysis for red blood cell

(a) Biplot of carbon ( $\delta^{13}\text{C}$ , x axis) and nitrogen ( $\delta^{15}\text{N}$ , y axis) stable isotope values. Black dots are isotopic signatures of individual red knots from red blood cell. Different prey items plotted on; soft preys (brown shrimp *Crangon crangon* and polychaete worm *Nephtys hombergii*) and hard-shelled preys (cockle *Cerastoderma edule* and balthic tellin *Limecola balthica*).

(b). Posterior distributions for red knot diet proportions (estimated using blood cell stable isotope samples) as a function of exploration speed ( $\log_{10}$  cm/s) measured in the mobile arena for the first time. MixSIAR model predicted that on average, red knots proportionally consumed more hard-shelled prey (Median = 0.67, 2.5 % CrI = 0.56, 97.5 % CrI = 0.75) than soft prey (Median = 0.34, 2.5 % CrI = 0.23, 97.5 % CrI = 0.44). Slower explorers depend upon hard-shelled prey while faster explorers consume both soft- and hard-shelled prey. Proportion of diet estimated from the Bayesian mixing model for isotope analysis MixSIAR. Lines depict posterior means, and shading displays the 95% credible intervals.

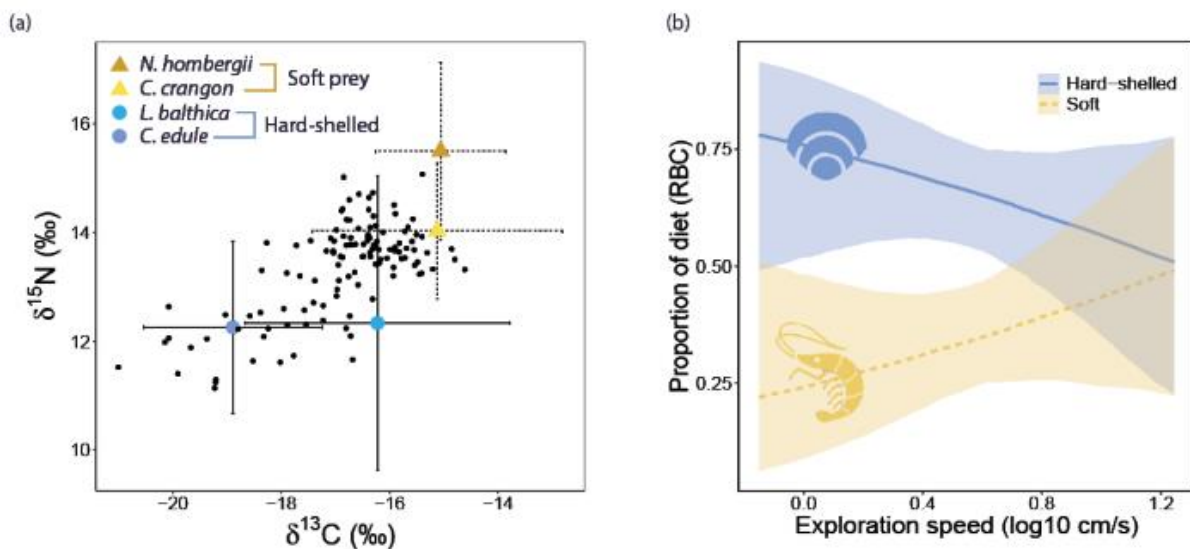

### Supplementary Figure S9: MixSIAR Posterior distribution for red blood cell

Posterior distribution of model estimates for slower exploring knots (on the left) and faster exploring knots (on the right). Diet estimated from red blood cell stable isotope samples. For slower exploring red knots, the model estimate of  $p_{\text{hard-shelled prey}}$  is 0.77 (Median, 2.5 % CrI = 0.51, 97.5 % CrI = 0.94) and  $p_{\text{soft prey}}$  is 0.23 (Median, 2.5 % CrI = 0.65, 97.5 % CrI = 0.49). For faster exploring red knots, model estimate of  $p_{\text{hard-shelled prey}}$  is 0.51 (Median, 2.5 % CrI = 0.23, 97.5 % CrI = 0.79) and  $p_{\text{soft prey}}$  is 0.49 (Median, 2.5 % CrI = 0.51, 97.5 % CrI = 0.94).

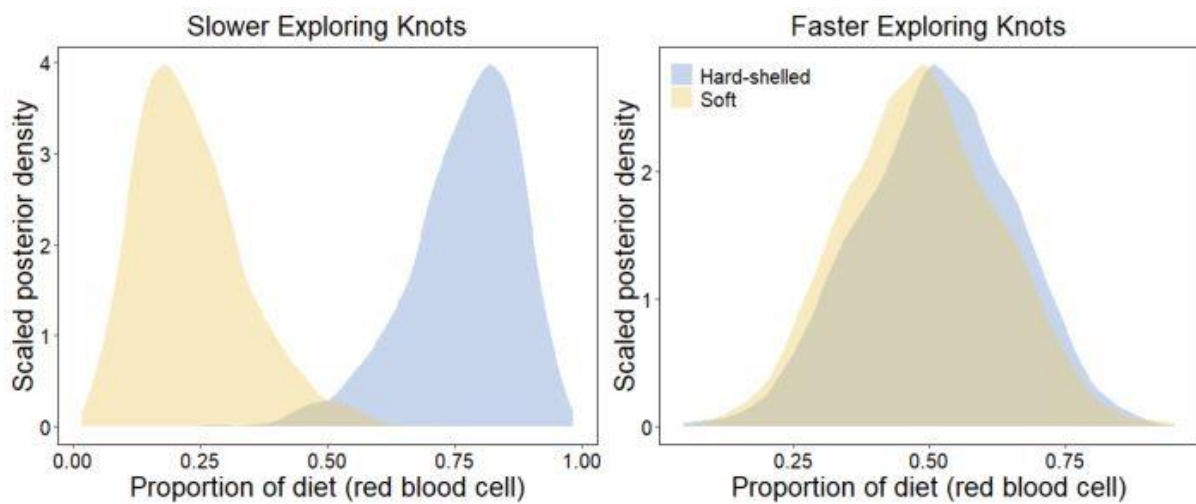

**Supplementary Table S1: Ethogram of all videos recorded behaviours in the field**

| <b>Behaviour</b>                                  | <b>Description</b>                                                                                                                                                               |
|---------------------------------------------------|----------------------------------------------------------------------------------------------------------------------------------------------------------------------------------|
| Aerial Vigilance                                  | Looking up by tilting the head                                                                                                                                                   |
| Ingesting                                         | Ingesting prey item (cockle/white shellfish, shrimp, worm, not specified)                                                                                                        |
| Kleptoparasitism                                  | Prey item stolen by other bird (common gull, another knot, black-headed gull, other)                                                                                             |
| Walking                                           | Moving to another location. Can be slow or fast, also on one leg. During foraging only count walking when >2 sec when bird moves in certain direction and head is up > 90° angle |
| Flying                                            | Taking off by flapping and then moving to another location                                                                                                                       |
| Tactile searching                                 | Looking for food buried in the ground, the bill forming a 45° angle with the horizontal, probing in the sand                                                                     |
| Visual searching                                  | Looking for food on the surface, head is 45° to 90° angle, head moves actively to look around                                                                                    |
| Handling                                          | Handling prey items. Prey needs to be visible or obvious ingestion at the end of handling                                                                                        |
| Social interference from focal bird               | Any kind of social interaction from focal bird to another bird                                                                                                                   |
| Social interference from other bird to focal bird | Any kind of social interaction from another bird to the focal bird                                                                                                               |
| Resting                                           | Standing still with its head under its feathers, can be on one leg                                                                                                               |
| Standing                                          | Standing on one or two legs with the bill in a 90° angle, without moving, for >2 sec                                                                                             |
| Preening                                          | Cleaning and/or rearranging its feathers with the bill, by flapping or shaking, scratching with its foot, stretching wings and legs                                              |
| Ground Vigilance                                  | Head turning side to side with the bill in a 90° angle. Only if >1sec                                                                                                            |
| Bathing                                           | The bird is in the water washing itself                                                                                                                                          |
| Miscellaneous                                     | Behaviour that does not fit the descriptions above                                                                                                                               |
| Out of sight                                      | The bird cannot be seen by the observer                                                                                                                                          |
